1 **Limited specificity of SARS-CoV-2 antigen-detecting rapid diagnostic tests at**  
2 **low temperatures**

3

4 Verena Haage<sup>1</sup>, Andres Moreira-Soto<sup>1</sup>, Jilian A. Sacks<sup>2</sup>, Victor Corman<sup>1,3</sup>, Christian  
5 Drosten<sup>1,3</sup>, Felix Drexler<sup>1,3</sup>

6

7 <sup>1</sup>Institute of Virology, Charité-Universitätsmedizin Berlin, Corporate Member of Freie  
8 Universität Berlin, Humboldt-Universität zu Berlin, and Berlin Institute of Health,  
9 Berlin, Germany

10 <sup>2</sup> Foundation for Innovative New Diagnostics (FIND), Geneva, Switzerland

11 <sup>3</sup> German Centre for Infection Research (DZIF), Associated Partner Charité-  
12 Universitätsmedizin Berlin, Berlin, Germany

13

14 \*Correspondence: Jan Felix Drexler, Helmut-Ruska-Haus, Institute of Virology,  
15 Campus Charité Mitte, Charitéplatz 1, 10098 Berlin, Germany; Email:

16 [felix.drexler@charite.de](mailto:felix.drexler@charite.de)

17

18

19 **Keywords:** SARS-CoV-2, rapid antigen tests, specificity, temperature stability,  
20 diagnostics, cold settings

21

22

23

24

25

NOTE: This preprint reports new research that has not been certified by peer review and should not be used to guide clinical practice.

26

## 27 **Abstract**

28 SARS-CoV-2 antigen-detecting rapid diagnostic tests (Ag-RDTs) are available within  
29 and outside of health care settings to enable increased access to COVID-19 diagnosis.  
30 These environments include provisional testing facilities, lacking temperature control;  
31 as outside temperatures fall, recommended testing temperatures cannot be  
32 guaranteed. We report impaired specificity in two out of six Ag-RDTs when used at 2-  
33 4°C, indicating that testing in cold settings might cause false-positive results potentially  
34 entailing unwarranted quarantine assignments and incorrect incidence estimates.

35

## 36 **Introduction**

37 SARS-CoV-2 antigen-detecting tests were introduced into the global market during late  
38 2020 and are now widely used, in both the global north and south. Many regions  
39 located in the northern hemisphere such as the United States or Europe are currently  
40 severely affected by the second wave of the COVID-19 pandemic (1, 2). To manage  
41 testing demand many physicians, healthcare and public health systems have opened  
42 external testing stations such as `diagnostic streets´ or drive-through facilities in urban  
43 settings (3). In Berlin, a German metropolis with a population of about 3.5 million  
44 inhabitants, several outside testing stations in tents or pavilions are in use, produced  
45 by manufacturers who offer special corona test cabins (4). These facilities are often of  
46 provisional nature, for example in the form of unheated tents. In the winter months,  
47 temperatures in Europe or the U.S. can range from -10°C to 10°C (5, 6), well below  
48 the recommended operating temperatures of most Ag-RDTs. Most manufacturers of  
49 SARS-CoV-2 Ag-RDTs specify storage conditions between 2-30°C, but stipulate that  
50 tests be equilibrated to room temperature (15-30°C) at the time of use to guarantee  
51 their performance. With temperatures around freezing point during the winter months,  
52 unheated testing facilities cannot always comply with these conditions. Moreover, as

53 the national COVID-19 reference laboratory in Germany, we were contacted by  
54 physicians from two German metropolises both reporting an unusual high number of  
55 positive SARS-CoV-2 Ag-RDTs from outside testing facilities. To test whether  
56 operation of SARS-CoV-2 Ag-RDTs at low outside temperatures impacts their  
57 performance, we selected six (**Table 1**) out of the 139 currently commercially available  
58 SARS-CoV-2 Ag-RDTs (7) based on clinical performance data (8) and market  
59 availability, for validation of specificity when stored and/or operated at cold outside  
60 temperatures of 2-4°C.

61

## 62 **Materials and Methods**

63 Tested conditions included: (a) storage and testing of Ag-RDTs at recommended  
64 conditions (15-30°C); (b) storage of tests at recommended conditions, pre-incubation  
65 of tests for 30mins to cold-temperatures (2-4°C) and testing at cold temperatures (2-  
66 4°C); and (c) storage of tests at 2-4°C followed by testing at 2-4°C (**Figure 1A**).

67 Analytical specificity was examined by testing for cross-reactivity with common cell  
68 culture-derived respiratory viruses including the ubiquitous human coronaviruses  
69 (HCoV) HCoV-229E ( $2.9 \times 10^7$  copies/ml), HCoV-OC43 ( $1.0 \times 10^6$  copies/ml), influenza  
70 virus A H1N1 ( $7.8 \times 10^6$  copies/ml) and rhinovirus A ( $2.2 \times 10^6$  copies/ml). Concentrations  
71 were selected according to the guidelines on analytical specificity testing for SARS-  
72 CoV-2 Ag-RDTs published by the German Federal Institute for Vaccines and  
73 Biomedicines (9). 20 µl of viral cell culture supernatant were added to proprietary lysis  
74 buffer or as an internal control, and 20 µl of lysis buffer were directly applied to test  
75 cassettes for validation experiments. Tests were performed in duplicates, according to  
76 the test-specific supplier instructions for use and results were scored independently by  
77 two persons. We additionally tested ten healthy laboratory members who previously  
78 volunteered for a SARS-CoV-2 Ag-RDT validation study (8). Healthy volunteers were

79 without symptoms of respiratory tract infection and tested negative for SARS-CoV-2  
80 by RT-qPCR (10). All subjects received instructions on self-sampling, swabs were  
81 immediately dissolved in 1ml PBS and 20 $\mu$ l of PBS were added to proprietary buffer  
82 for testing. In a recent study, self-sampling was shown to be a reliable alternative to  
83 professional nasopharyngeal swabs for Ag-RDTs (11).

84

## 85 **Results**

86 Two of the six SARS-CoV-2 Ag-RDTs showed impaired specificity (**Figure 1B**) when  
87 stored at room temperature, but exposed to 2-4 $^{\circ}$ C for 30 minutes prior to testing at 2-  
88 4 $^{\circ}$ C as cross-reactivity with common respiratory viruses, and false-positive results  
89 occurred in healthy volunteers in the form of weak, but clearly visible bands (**Figure**  
90 **1C**). In one test (test I), unspecific reactivity was only observed upon short-term  
91 incubation at 2-4 $^{\circ}$ C followed by test operation at 2-4 $^{\circ}$ C, but not after long-term storage  
92 at 2-4 $^{\circ}$ C. In contrast, the other test yielding unspecific results (test II) yielded almost  
93 identically unspecific results after both, short- and long-term storage at 2-4 $^{\circ}$ C and  
94 operation at 2-4 $^{\circ}$ C (**Figure 1B**). On the one hand, those data highlight differences  
95 between test devices. On the other hand, our results may hint at effects of relatively  
96 rapid temperature changes on some tests for unknown reasons, potentially including  
97 environmental factors such as condensation. Results were reproducible and  
98 functionality of tests was confirmed by determining their level of detection using serial  
99 dilutions of SARS-CoV-2 nucleoprotein (SARS-CoV-2-N) at recommended conditions  
100 as previously described (8).

101

## 102 **Discussion**

103 Our study highlights that specificity of SARS-CoV-2 Ag-RDTs may be impaired when  
104 operating tests at temperatures that differ from recommended conditions (15-30 $^{\circ}$ C),

105 leading to false-positive results. These results were observed for only certain test  
106 brands including one of the Ag-RDT currently listed for emergency use by the World  
107 Health Organization (12, 13), highlighting that each test may need to be considered  
108 specifically and broader validation of temperature robustness of SARS-CoV-2 RDTs  
109 should be performed. Moreover, impaired sensitivity of SARS-CoV-2 Ag-RDTs at  
110 elevated temperatures has been reported previously (14), highlighting the importance  
111 of test operation at recommended temperatures. Of note, all tests studied here were  
112 shown to be highly specific when operated at recommended conditions in prior studies  
113 (8, 14), underlining that impaired specificity is not a test-intrinsic problem but owed to  
114 test operation under conditions beyond those defined by the manufacturer.

115 Our data imply that caution must be taken when offering SARS-CoV-2 Ag-RDT  
116 diagnostics in settings lacking temperature control, including diagnostic streets or  
117 drive-through testing stations in car parks (3). Especially under provisional conditions  
118 when minimally-trained or unexperienced staff perform diagnostic tests, the  
119 establishment of laboratory workflows and compliance with the conditions  
120 recommended by the manufacturer are vital to ensure accurate testing (15). Until  
121 January 14<sup>th</sup> 2021, severity of regional lockdown measures in Germany is increased  
122 upon trespassing 7-day incidences of 200 per 100.000 inhabitants (16), highlighting  
123 the potential consequences of false-positive test results beyond potentially  
124 unwarranted individual quarantine assignments, if those results were reported to public  
125 health authorities without confirmation by a gold standard test such as RT-PCR (10).

126

127

128

129

130

131 **Funding**

132 The study was partially supported by the Foundation for Innovative New Diagnostics  
133 (FIND), including procurement of some test kits. The findings and conclusions  
134 contained within are those of the authors and do not necessarily reflect positions or  
135 policies of FIND.

136

137 **Conflict of interest:** The authors declare no conflict of interest.

138

139

140

141

142

143

144

145

146

147

148

149

150

151

152

153

154

155

156

157 **Table 1. Overview of SARS-CoV-2 rapid antigen tests included in the study**

| <b>ID</b>  | <b>Test</b>                                         | <b>Manufacturer</b>                       | <b>Lot No.</b>                                         |
|------------|-----------------------------------------------------|-------------------------------------------|--------------------------------------------------------|
| <b>I</b>   | Panbio™ COVID-19 Ag Rapid Test                      | Abbott Laboratories                       | 41ADF012A                                              |
| <b>II</b>  | ActivXpress + COVID-19 Antigen Complete Testing Kit | Edinburgh Genetics                        | AG20200905                                             |
| <b>III</b> | COVID-19 Ag                                         | Genedia                                   | 643X2005                                               |
| <b>IV</b>  | ichroma - COVID-19 Ag                               | Boditech Med                              | SRQHA27                                                |
| <b>V</b>   | COVID-19 Antigen Rapid Test Kit                     | JOYSBIO (Tianjin) Biotechnology Co., Ltd. | 2020092409                                             |
| <b>VI</b>  | SARS-CoV-2 Rapid Antigen Test                       | Roche Diagnostics*                        | QCO3020083<br>QCO390003I/Sub:I-2<br>QCO390011A/Sub:A-2 |

158 \* equals STANDARD Q COVID-19 Test by SD Biosensor, Inc.

159

160

161

162

163

164

165

166

167

168

169

170

171

172

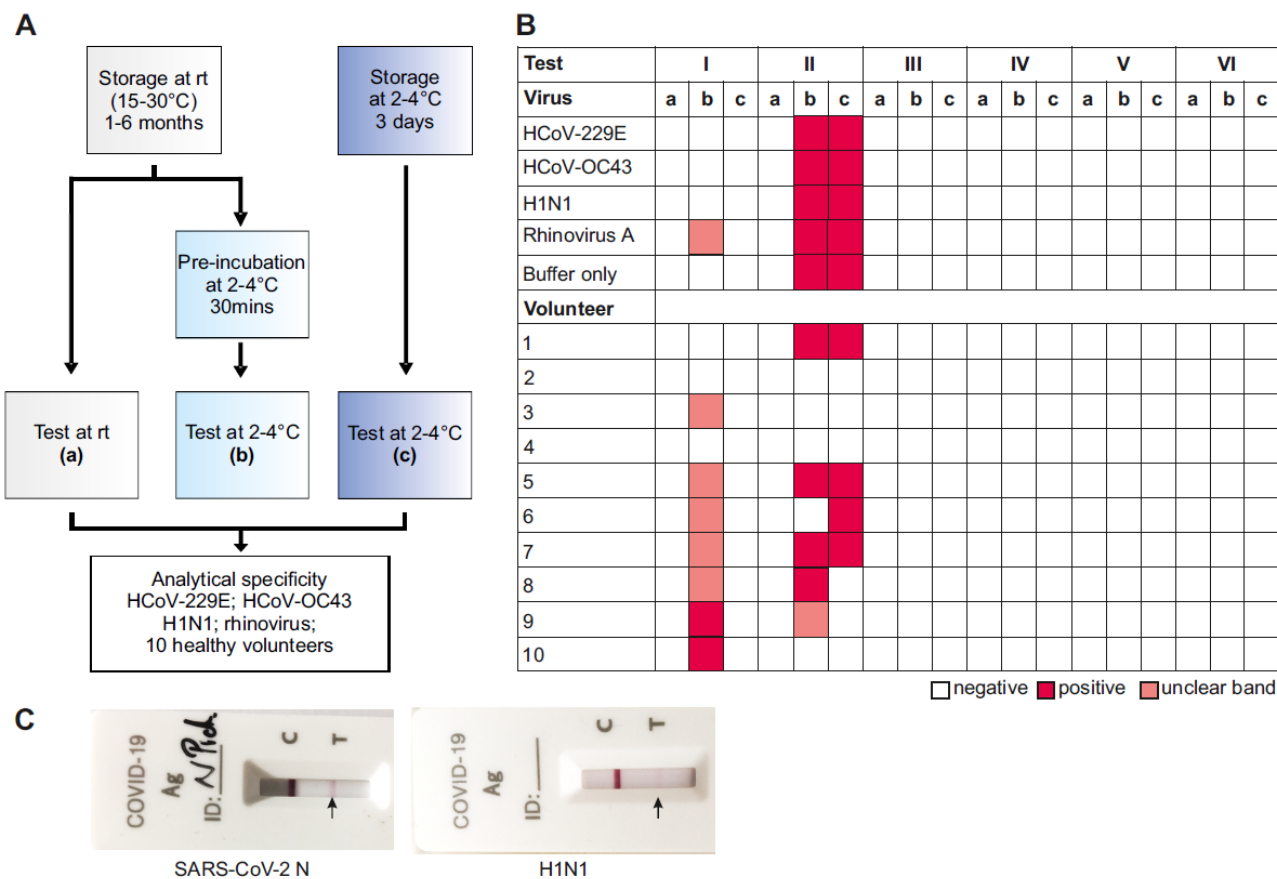

173  
 174 **Figure 1. Experimental setup and results for specificity testing of SARS-CoV-2**  
 175 **Ag-RDTs. A.** (a): storage and operation at recommended conditions; (b):  
 176 recommended storage, pre-incubation at 2-4°C for 30mins and operation at 2-4°C; (c):  
 177 storage and operation at 2-4°C. **B.** Specificity of SARS-CoV-2 Ag-RDTs decreases at  
 178 low temperatures. (a): rt storage- rt testing; (b): rt storage – 2-4°C 30 min pre-  
 179 incubation – 2-4°C testing; (c): 2-4°C storage – 2-4°C testing. red: positive; white:  
 180 negative; salmon: weak band, result unclear. rt: room temperature. I: Abbott; II:  
 181 ActivXpress; III: Genedia; IV: ichroma; V: JOYSBIO; VI: Roche. **C.** Example for  
 182 observed cross-reactivity of the ActivXpress test with Influenza virus A H1N1 and  
 183 SARS-CoV-2 nucleoprotein as positive control (SARS-CoV-2-N; 5µg/ml) when tested  
 184 under condition (b): recommended storage, pre-incubation at 2-4°C for 30mins and  
 185 operation at 2-4°C.



## 186 References

- 187  
188 1. <https://coronavirus.jhu.edu/us-map>. Accessed 14.01.2021.  
189 2. <https://www.ecdc.europa.eu/en/cases-2019-ncov-eueea>. Accessed 14.01.2021.  
190 3. Shah A, Challener D, Tande AJ, Mahmood M, O'Horo JC, Berbari E, Crane SJ. 2020. Drive-  
191 Through Testing: A Unique, Efficient Method of Collecting Large Volume of Specimens During  
192 the SARS-CoV-2 (COVID-19) Pandemic. *Mayo Clinic Proceedings* 95:1420-1425.  
193 4. [https://www.dwd.de/DE/wetter/vorhersage\\_aktuell/berlin\\_brandenburg/vhs\\_bbb\\_node.html](https://www.dwd.de/DE/wetter/vorhersage_aktuell/berlin_brandenburg/vhs_bbb_node.html).  
194 Accessed 11.01.2021.  
195 5. <https://climate.copernicus.eu/european-temperature>. Accessed 14.01.2021.  
196 6. [https://www.ncdc.noaa.gov/climate-information/statistical-weather-and-climate-](https://www.ncdc.noaa.gov/climate-information/statistical-weather-and-climate-information)  
197 [information](https://www.ncdc.noaa.gov/climate-information/statistical-weather-and-climate-information). Accessed 14.01.2021.  
198 7. <https://www.finddx.org/covid-19/pipeline>. Accessed 13.01.2021.  
199 8. Corman VM, Haage VC, Bleicker T, Schmidt ML, Mühlemann B, Zuchowski M, Jó Lei WK,  
200 Tscheak P, Möncke-Buchner E, Müller MA, Krumbholz A, Drexler JF, Drosten C. 2020.  
201 Comparison of seven commercial SARS-CoV-2 rapid Point-of-Care Antigen tests. medRxiv  
202 doi:10.1101/2020.11.12.20230292:2020.11.12.20230292.  
203 9. Sinne ABMfS-C-Ai, Antigen Schnelltests. vAST.  
204 10. Corman VM, Landt O, Kaiser M, Molenkamp R, Meijer A, Chu DK, Bleicker T, Brünink S,  
205 Schneider J, Schmidt ML, Mulders DG, Haagmans BL, van der Veer B, van den Brink S,  
206 Wijsman L, Goderski G, Romette J-L, Ellis J, Zambon M, Peiris M, Goossens H, Reusken C,  
207 Koopmans MP, Drosten C. 2020. Detection of 2019 novel coronavirus (2019-nCoV) by real-  
208 time RT-PCR. *Eurosurveillance* 25:2000045.  
209 11. Lindner AK, Nikolai O, Kausch F, Wintel M, Hommes F, Gertler M, Krüger LJ, Gaeddert M,  
210 Tobian F, Lainati F, Köppel L, Seybold J, Corman VM, Drosten C, Hofmann J, Sacks JA,  
211 Mockenhaupt FP, Denkinger CM. 2020. Head-to-head comparison of SARS-CoV-2 antigen-  
212 detecting rapid test with self-collected anterior nasal swab versus professional-collected  
213 nasopharyngeal swab. medRxiv doi:10.1101/2020.10.26.20219600:2020.10.26.20219600.  
214 12. [https://www.who.int/diagnostics\\_laboratory/eual/listing/en/](https://www.who.int/diagnostics_laboratory/eual/listing/en/). Accessed 14.01.2021.  
215 13. [https://www.who.int/diagnostics\\_laboratory/200922\\_eul\\_sars\\_cov2\\_product\\_list.pdf?ua=1](https://www.who.int/diagnostics_laboratory/200922_eul_sars_cov2_product_list.pdf?ua=1).  
216 Accessed 14.01.2021.  
217 14. Haage V, de Oliveira-Filho EF, Moreira-Soto A, Kühne A, Fischer C, Sacks J, Corman VM,  
218 Müller MA, Drosten C, Drexler JF. 2021. Impaired performance of SARS-CoV-2 antigen-  
219 detecting rapid tests at elevated temperatures. medRxiv  
220 doi:10.1101/2021.01.06.21249314:2021.01.06.21249314.  
221 15. Fischer C, Mögling R, Melidou A, Kühne A, Oliveira-Filho EF, Wolff T, Reiche J, Broberg E,  
222 Meijer A, Leitmeyer K, Drexler JF, Reusken C. 2020. Variable sensitivity in molecular detection  
223 of SARS-CoV-2 in European Expert Laboratories: External Quality Assessment, June - July  
224 2020. *J Clin Microbiol* doi:10.1128/jcm.02676-20.  
225 16. [https://www.bundesregierung.de/breg-de/themen/coronavirus/corona-massnahmen-](https://www.bundesregierung.de/breg-de/themen/coronavirus/corona-massnahmen-1734724)  
226 [1734724](https://www.bundesregierung.de/breg-de/themen/coronavirus/corona-massnahmen-1734724). Accessed 14.01.2021.

227
